# Supplementary material for: Plasma fluorination of vertically aligned carbon nanotubes: functionalization and thermal stability
Source: publisher site journal article supplement (doi:10.3762/bjnano.6.232), 2015-12-01
Supplement: Additional file 1 [file 2190-4286-6-232-S1.pdf]

# Supporting Information

for

## **Plasma fluorination of vertically aligned carbon nanotubes: functionalization and thermal stability**

Claudia Struzzi<sup>1</sup>, Mattia Scardamaglia<sup>1</sup>, Axel Hemberg<sup>2</sup>, Luca Petaccia<sup>3</sup>, Jean-François Colomer<sup>4</sup>,  
Rony Snyders<sup>1,2</sup> and Carla Bittencourt<sup>1\*§</sup>

Address: <sup>1</sup>Chimie des Interactions Plasma-Surface, CIRMAP, University of Mons, 7000 Mons, Belgium, <sup>2</sup>Materia Nova Research Center, 7000 Mons, Belgium, <sup>3</sup>Elettra Sincrotrone Trieste, Strada Statale 14 km 163.5, 34149 Trieste, Italy, and <sup>4</sup>Research Group on Carbon Nanostructures (CARBONNAGE), University of Namur, 5000 Namur, Belgium

Email: Carla Bittencourt\* - [carla.bittencourt@umons.ac.be](mailto:carla.bittencourt@umons.ac.be)

\*Corresponding author

§Tel.: +32 065554963

## Additional experimental information.

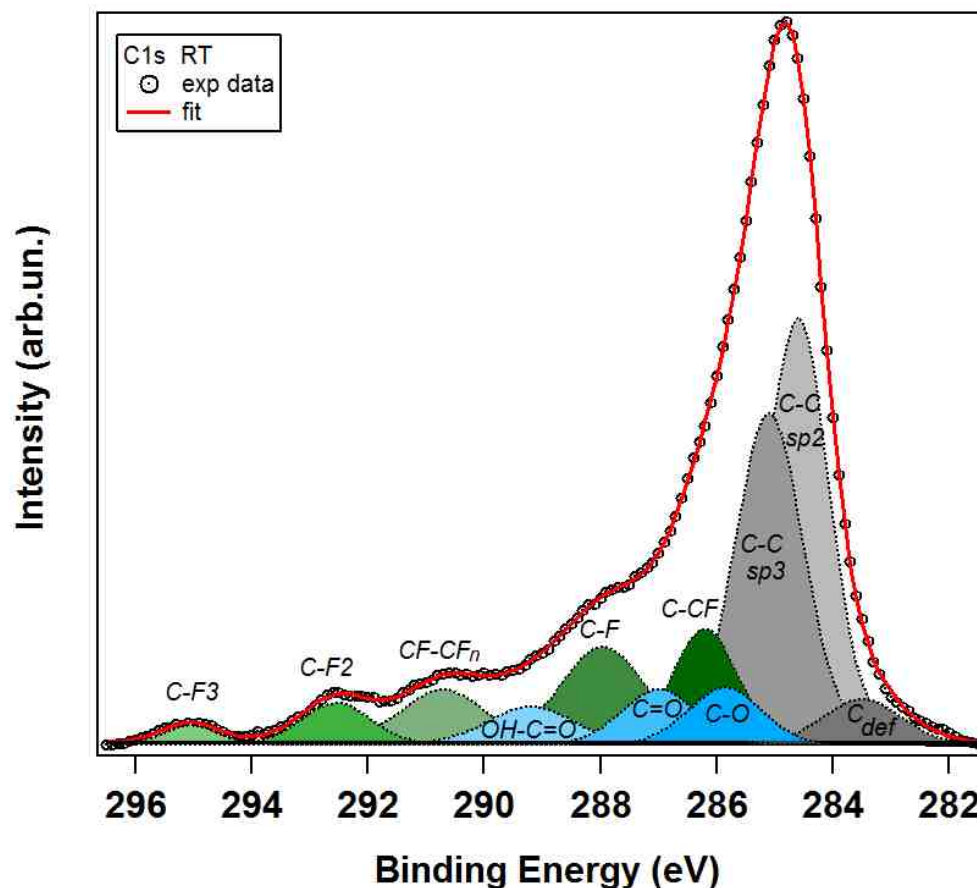

**Figure S1:** XPS curve fitting of as-functionalized vCNT referred to room temperature (RT) case in the article. The  $C_{1s}$  experimental data recorded after the fluorination are represented by black markers, the curve fitting is the red line over imposed. The grey scale colored curves are fitting components related to carbon-carbon bond ( $C_{def}$  usually associated to ion induced defective carbon, C-C bonds in  $sp^2$  and  $sp^3$  configurations), the blue ones are related to carbon bound to oxygen (C-O, C=O, OH-C=O), while carbon bound to fluorine atoms are reported as green scale curves (C-CF, C-F, CF-CF<sub>n</sub>, C-F<sub>2</sub> and C-F<sub>3</sub>).

|                  | <b>F1s</b> |       |       |       | <b>O1s</b> |       |       |       |
|------------------|------------|-------|-------|-------|------------|-------|-------|-------|
| <b>RT</b>        | 9.0%       | 32.3% | 33.8% | 24.9% | 12.4%      | 25.2% | 52.1% | 10.3% |
| <b>BE (eV)</b>   | 688.7      | 687.4 | 685.8 | 684.3 | 533.8      | 532.5 | 531.0 | 529.8 |
| <b>FWHM (eV)</b> | 1.8        | 2.1   | 1.9   | 2.1   | 2.0        | 1.6   | 1.6   | 1.8   |
| <b>150 °C</b>    | 9.5%       | 47.6% | 36.3% | 6.6%  | 12.7%      | 30.5% | 55.4% | 1.4%  |
| <b>BE (eV)</b>   | 688.7      | 687.3 | 686.0 | 684.4 | 533.7      | 532.4 | 531.2 | 529.2 |
| <b>FWHM (eV)</b> | 1.6        | 2.0   | 2.1   | 1.7   | 1.9        | 1.7   | 1.5   | 1.3   |
| <b>300 °C</b>    | 9.4%       | 75.7% | 14.9% | -     | 13.0%      | 18.8% | 68.2% | -     |
| <b>BE (eV)</b>   | 688.7      | 687.3 | 685.7 | -     | 533.9      | 532.7 | 531.5 | -     |
| <b>FWHM (eV)</b> | 2.0        | 1.9   | 2.1   | -     | 1.7        | 1.4   | 1.5   | -     |
| <b>430 °C</b>    | 5.5%       | 83.8% | 10.7% | -     | 8.6%       | 17.0% | 74.4% | -     |
| <b>BE (eV)</b>   | 688.7      | 687.4 | 685.7 | -     | 534.1      | 532.7 | 531.7 | -     |
| <b>FWHM (eV)</b> | 2.4        | 1.9   | 1.8   | -     | 1.5        | 1.4   | 1.6   | -     |
| <b>540 °C</b>    | 12.6%      | 59.0% | 28.4% | -     | 5.6%       | 16.6% | 77.8% | -     |
| <b>BE (eV)</b>   | 688.8      | 687.3 | 685.8 | -     | 534.1      | 532.8 | 531.8 | -     |
| <b>FWHM (eV)</b> | 2.3        | 2.1   | 2.0   | -     | 1.2        | 1.3   | 1.5   | -     |
| <b>900 °C</b>    | -          | -     | -     | -     | -          | 23.1% | 76.9% | -     |
| <b>BE (eV)</b>   | -          | -     | -     | -     | -          | 532.7 | 531.4 | -     |
| <b>FWHM (eV)</b> | -          | -     | -     | -     | -          | 1.7   | 1.8   | -     |

**Table S1:** Summary of the peak fitting analysis of F<sub>1s</sub> and O<sub>1s</sub> core level spectra recorded from functionalized sample (RT) and for all heating steps (150 °C, 300 °C, 430 °C, 540 °C, 900 °C). Relative area values (%), position of the components (BE, binding energy) and full width at half maximum (FWHM) are listed.
